# Supplementary material
Source: PubMed Central journal article supplement (PMC3147472)
Supplement: supp_77_15_5089__1.pdf [file supp_77_15_5089__1.pdf]

**Supplementary Material:****TABLE 1S: Primers used in this study**

| <b>Primer</b> | <b>Sequence (5' – 3')</b>           |
|---------------|-------------------------------------|
| M13_for       | CGCCAGGGTTTTCCCAGTCACGAC            |
| T7 promoter   | TAATACGACTCACTATAGGG                |
| T3 promoter   | ATTAACCCTCACTAAAGGGA                |
| T7 terminator | GCTAGTTATTGCTCAGCGG                 |
| M13_20        | GTAAAACGACGGCCAGT                   |
| M13_rev       | GGAAACAGCTATGACCATG                 |
| aldR_for      | CTATCCGGTTCGGACAAGGACTGG            |
| aldR_rev      | ATGAGAAAAGTGCGAGCGGTTTGAC           |
| dlhR_for      | <u>CATATG</u> ATTCCTTCGCATGTTCC     |
| dlhR_rev      | <u>AAGCTT</u> GACCTTACGAAGGCTC      |
| hitR_for      | GGTTTCTCGACGGTTGAAACTG              |
| hitR_rev      | CGTGCTGCAAATGCCTGATG                |
| hydR_for      | GCTTCATGTGCACGTCATCG                |
| hydR_rev      | AGCACCTGGAGGAGATCGATG               |
| qsdR1_for     | CGCC <u>CATATG</u> CCGCATGCAGAAACAA |
| qsdR1_rev     | ACTG <u>GCTCGAGT</u> GAGTCCCAGACGA  |
| qsdR2_for     | CTTTCCGCGGCAAGCGTAAC                |
| qsdR2_rev     | CGCATCTCTAACTGGCTCATATGTC           |

\*inserted restriction sites are underlined

**TABLE 2S: Putative hydrolases found in NGR234**

| ORF ID     | Annotated/predicted Function                                                | Size of protein<br>(no.of AA) |
|------------|-----------------------------------------------------------------------------|-------------------------------|
| NGR_c10830 | putative hydrolase                                                          | 208                           |
| NGR_c28340 | putative esterase/hydrolase                                                 | 349                           |
| NGR_c16700 | putative hydrolase                                                          | 251                           |
| NGR_c17080 | probable hydrolase                                                          | 306                           |
| NGR_b05590 | putative hydrolase or acyltransferase<br>(alpha/beta hydrolase superfamily) | 314                           |
| NGR_b05410 | putative esterase of the alpha/beta hydrolase superfamily                   | 261                           |
| NGR_b21240 | beta-ketoadipate enol-lactone hydrolase                                     | 273                           |
| NGR_c08550 | putative hydrolase                                                          | 203                           |
| NGR_c04450 | putative hydrolase                                                          | 392                           |
| NGR_b15930 | probable hydrolase                                                          | 219                           |
| NGR_b14140 | putative esterase of the alpha/beta hydrolase fold                          | 205                           |
| NGR_c21350 | hydrolase of the alpha/beta fold family                                     | 318                           |
| NGR_c05550 | putative hydrolase                                                          | 221                           |
| NGR_c08180 | putative hydrolase                                                          | 300                           |

**TABLE 3S: Putative QQ cosmid clones (this study) with their properties and positions**

| Cosmid clone | Location | ORF ID                | Coordinates<br>[bp]*  | Insert size<br>[bp] | No. of<br>ORFs |
|--------------|----------|-----------------------|-----------------------|---------------------|----------------|
| pWEB-TNC-A5  | cNGR234  | NGR_c35340-NGR_c35730 | 3 752 569 – 3 793 031 | 40462               | 39             |
| pWEB-TNC-B2  | pNGR234b | NGR_b21920-NGR_b22210 | 2 252 689 – 2 286 730 | 34041               | 30             |
| pWEB-TNC-B9  | cNGR234  | NGR_c15790-NGR_c16240 | 1 630 075 – 1 671 235 | 41160               | 45             |
| pWEB-TNC-C6  | pNGR234b | NGR_b16700-NGR_b17020 | 1 696 835 – 1 734 543 | 37708               | 33             |
| pWEB-TNC-G2  | cNGR234  | NGR_c23130-NGR_c23380 | 2 397 554 – 2 430 912 | 33358               | 26             |

\*orientated to *recA*
